# Supplementary material
Source: PubMed Central journal article supplement (PMC8142555)
Supplement: NIHMS1684293-supplement-Supplementary_Materials.pdf [file NIHMS1684293-supplement-Supplementary_Materials.pdf]

**Chiu et al. “Diverse cellular morphologies during lumen maturation in *Anopheles gambiae* larval salivary glands”.**

**Supplementary Figure Legends**

**Figure S1. Morphological characterization and cell count in an L4.2 salivary gland.**

(A-B,G) Representative images of L4 SGs stained with Hoechst (DNA, purple) and Nile Red (lipids, blue) dyes. (A-B) SG regions are outlined with a yellow dashed line. (A,D-E) Colored arrows (green, duct bud; yellow, small; orange, medium; blue, large) correspond to the size category of that cell and nucleus. (A) Cells and nuclei were counted in each L4 SG region and cells were classified into one of four discrete size categories (see D, E). The white arrows in (iii) indicate, from top to bottom: the duct bud region, the duct bud-proximal sac interface, and the proximal sac region. (B) An L4 SG showcasing the variety of cell/DNA sizes and shapes observed. Very small cells are marked by white arrows, while small, medium, and large cells are shown in (iv), (v), and (vi). (C) L4 SG length measurements by region. (D-E) In this L4 SG, there were 300 duct bud cells, 20 proximal sac cells, and 80 distal sac cells. Cell and DNA measurements are shown for the duct bud (D), the proximal sac (E), and the distal sac (E). (F) L4 SG proximal and distal sacs are connected by a single, shared lumen. Yellow arrows (i) indicate apical domains enriched for lipids and cytoplasmic markers (mtTFA, lamin). A row of cells (ii-iii) defines the boundary between PS and DS regions (white arrows, ii-iii). The lumen narrows slightly between sacs (white arrows, iv-v).

**Figure S2. Paucity of cells positive for two markers of Notch signaling.** Representative images from L4 SGs stained with Hoechst (DNA, purple), Nile Red (lipids, blue) and antisera against either Delta (green, A) or Notch (green, B). (A) Only three sac or duct bud cells with Delta staining (arrows). (B) No cells positive for Notch (B) in any larval SG region.

**Figure S3. Multiple control analyses strongly indicate high robustness of our staining methodology.** Various control and validation dye- and immuno-staining and confocal microscopy results in support of our methodology. (A) Representative images from L4 *Anopheles gambiae* salivary glands (SGs) stained with no primary antisera and only the secondary antibodies goat anti-mouse 647 (purple) and goat anti-rabbit 488 (green; i) or goat anti-rat 647 (purple) and donkey anti-goat 488 (green; ii). DIC light microscopy (not shown) allowed us to outline the SGs (dashed yellow line), and the fluorescence settings used were consistent with those used for SG staining throughout the study. (B-K) Representative images from L4 *Anopheles gambiae* salivary glands (SGs) stained with the dyes DAPI (DNA, purple), Nile Red (lipids, blue), and antisera against Fibrillarin (nucleolus; B; white), GM130 (Golgi; B; green), Cad99c (apical polarity marker; C; green), H+ V-ATPase (apical polarity marker; D; green), or Na+/K+ ATPase (apical polarity marker; E; green). (B) Pre-clearing various antisera using 0-2 hour old *Drosophila melanogaster* embryos did not alter the broad patterns of staining observed. Nucleoli (yellow arrows, B), basement membrane signal (yellow arrows, C) and cytoplasmic signal (yellow asterisks) are visible (compare Figs. S1B, 3C, and 3D). (C-E) Polarity marker localizations were confirmed in gastric cecae (white arrows, asterisks; Dii, Ev-vii), then determined in larval SG cells. Basement membrane localization (yellow arrows) and cytoplasmic signal (yellow asterisks) were observed. Very faint nuclear and nuclear membrane signal (Figs. S1Eiii-iv, orange and red arrows, respectively) were visible. (F) Representative images from day seven adult *Anopheles gambiae* female SGs permeablized with cold acetone and stained with DAPI

(DNA) and anti-lamin antisera. Results show variable nuclear shape persists at this stage and lamin C typically shows complete coverage of the perinuclear region in all cells. PL-proximal lateral lobe; DL-distal lateral lobe; M-medial lobe.

**Figure S4. Control analyses of *Drosophila* salivary gland TF antisera confirm that the staining methodology and reagents perform well.** Various control and validation dye- and immuno-staining and confocal microscopy results in support of our methodology. (A-F) Representative images from L4 *Anopheles gambiae* salivary glands (SGs) stained with the dyes DAPI (DNA, purple), Nile Red (lipids, blue), and stained with antibodies against CrebA (SG TF; A, C, E; green/white), Sage (SG TF; B, D, F; green/white), CrebA pre-IgG serum (D; green), or Sage pre-IgG serum (C; green). (A) CrebA antisera raised in two different host species colocalize (yellow arrows) on DNA and in SG cells. (B) Pre-clearing various antisera using 0-2 hour old *Drosophila melanogaster* embryos did not alter the broad patterns of staining observed (compare Figs. S2B, 3A, and 4A/D). Nucleoli, basement membrane signal (yellow arrows) and cytoplasmic signal (yellow asterisks) are visible. (C-D) Staining with Sage (C) or CrebA (D) pre-IgG serum did not show appreciable signal. (E-F) Staining with either CrebA (E) or Sage (F) showed very little, or no, localization to gastric cecae DNA.

**Figure S5. DAVID Results Contributing to GO Terms of Interest List and Extended Larval Anatomy Gene Expression Comparison.** (A) Tables showing the top 10 functional categories for each sector of the Venn Diagram shown in Figure 6A. These tables were used to define the GO categories of interest list (black text) in Figure 6D. (B) An extended version of Table 6C that includes expressed gene comparisons between larval gut compartments.

**Figure S6. Gene Lists Resulting from, and Experimental Evidence in Support of, the Gene Expression Meta-Analysis.** (A) List of all 496 genes expressed in every experiment included (Table S1) in gene expression meta-analysis, listed either by Vectorbase common name (57 genes) or Vectorbase ID (439 genes). (B) List of all 86 genes expressed only in larval SGs with respect to all datasets (Table S1) in this gene expression meta-analysis. (C) Reverse-transcriptase PCR from one representative technical replicate across five biological replicates of *Anopheles gambiae* (G3 strain) L4 stage SG, GC, or midgut replicates, amplifying two control genes (actin and elongation factor), as well as three SG transcription factors (*CrebA*, *fkh*, and *sage*), two saliva proteins important for adult blood feeding (*SG6* and *saglin*), and three digestive enzymes (*5' nucleosidase*, *maltase*, and *peroxidase*). All genes are expressed in all tissues (to widely varying levels), but not in all samples – except for *sage*, which is not observed in midgut samples. (D) Quantitative reverse transcriptase PCR abundance values [ $2^{-\Delta\Delta C_T}$ ] for the same set of samples and genes described in (C), with all five replicates averaged. In all cases except *sage* in midguts, again, all genes are expressed in all tissues to some level.

Figure S1

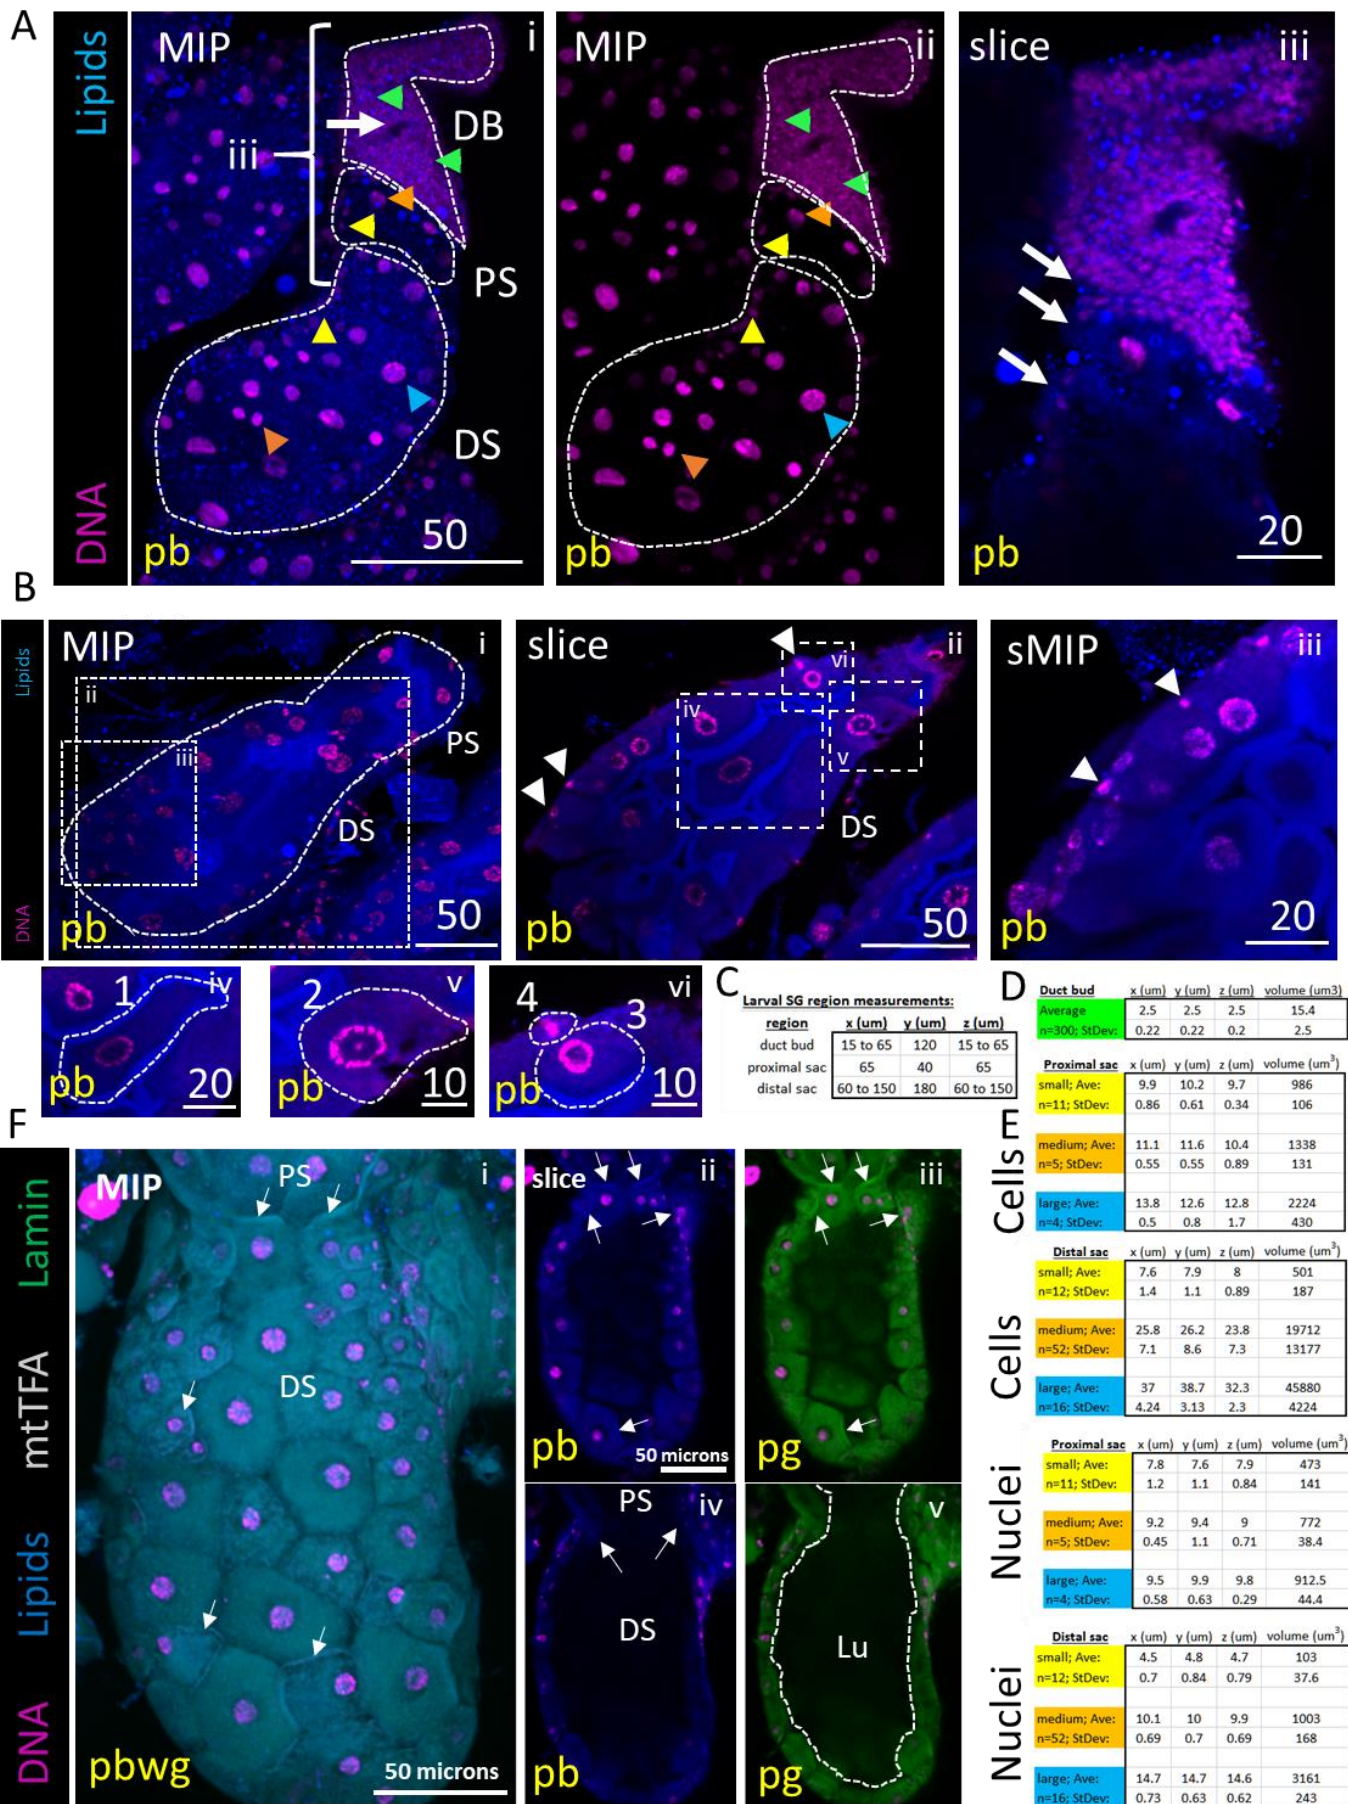

Figure S2

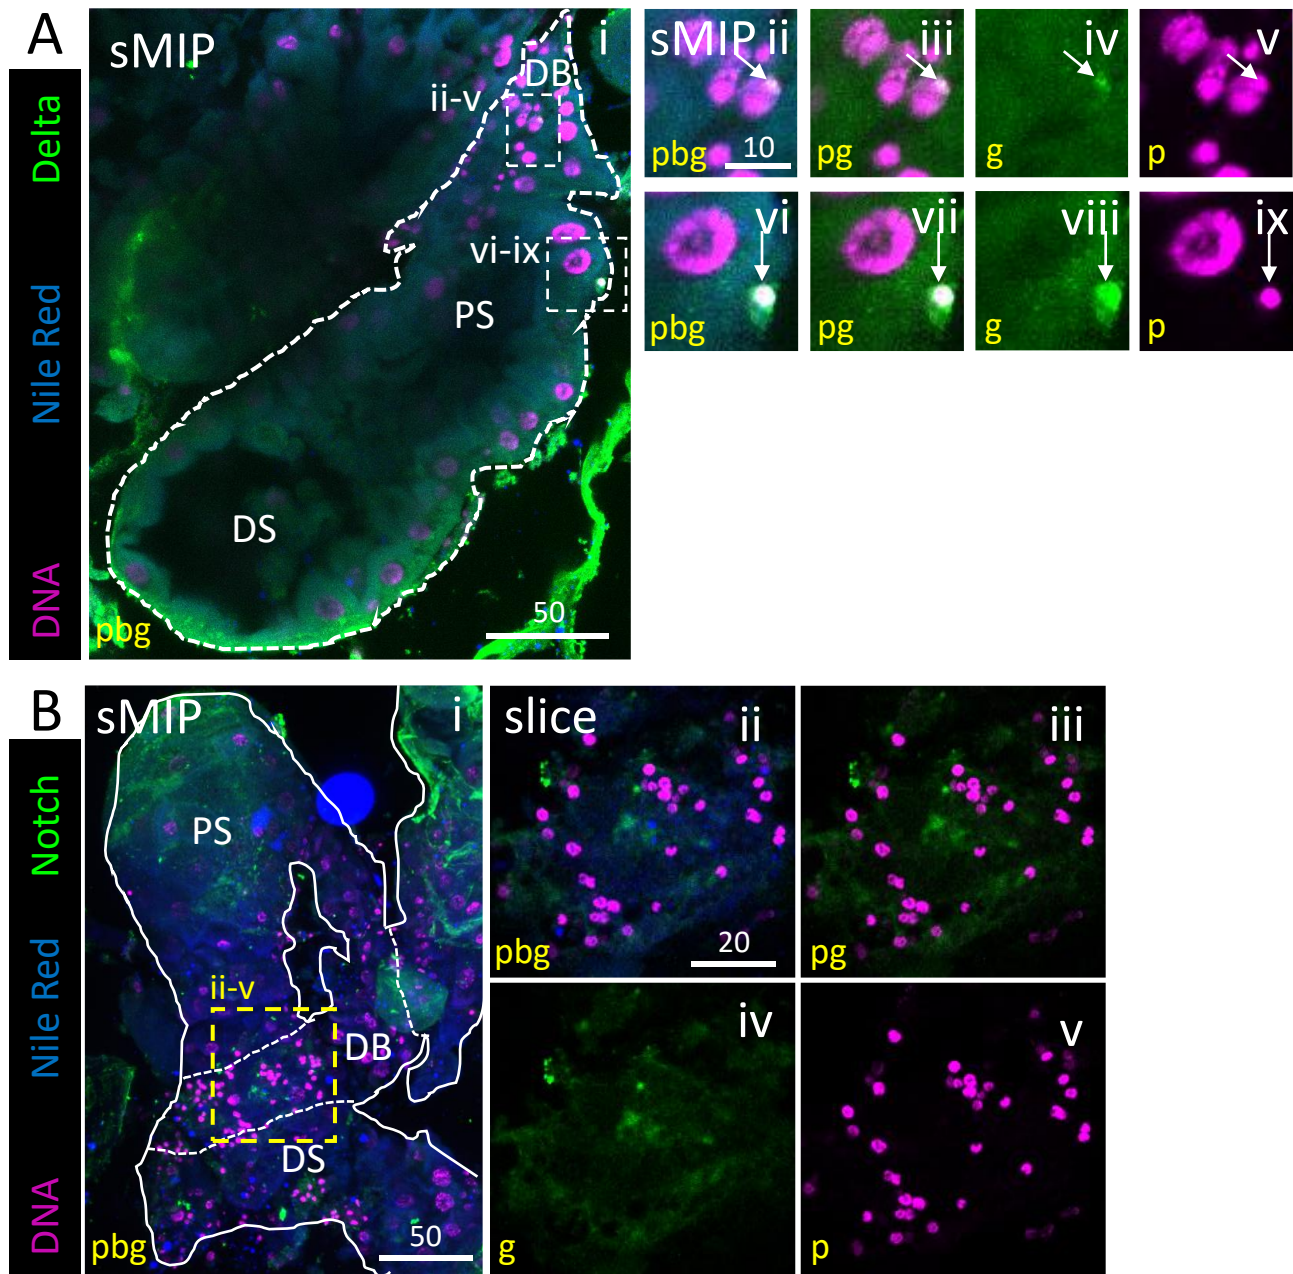

Figure S3

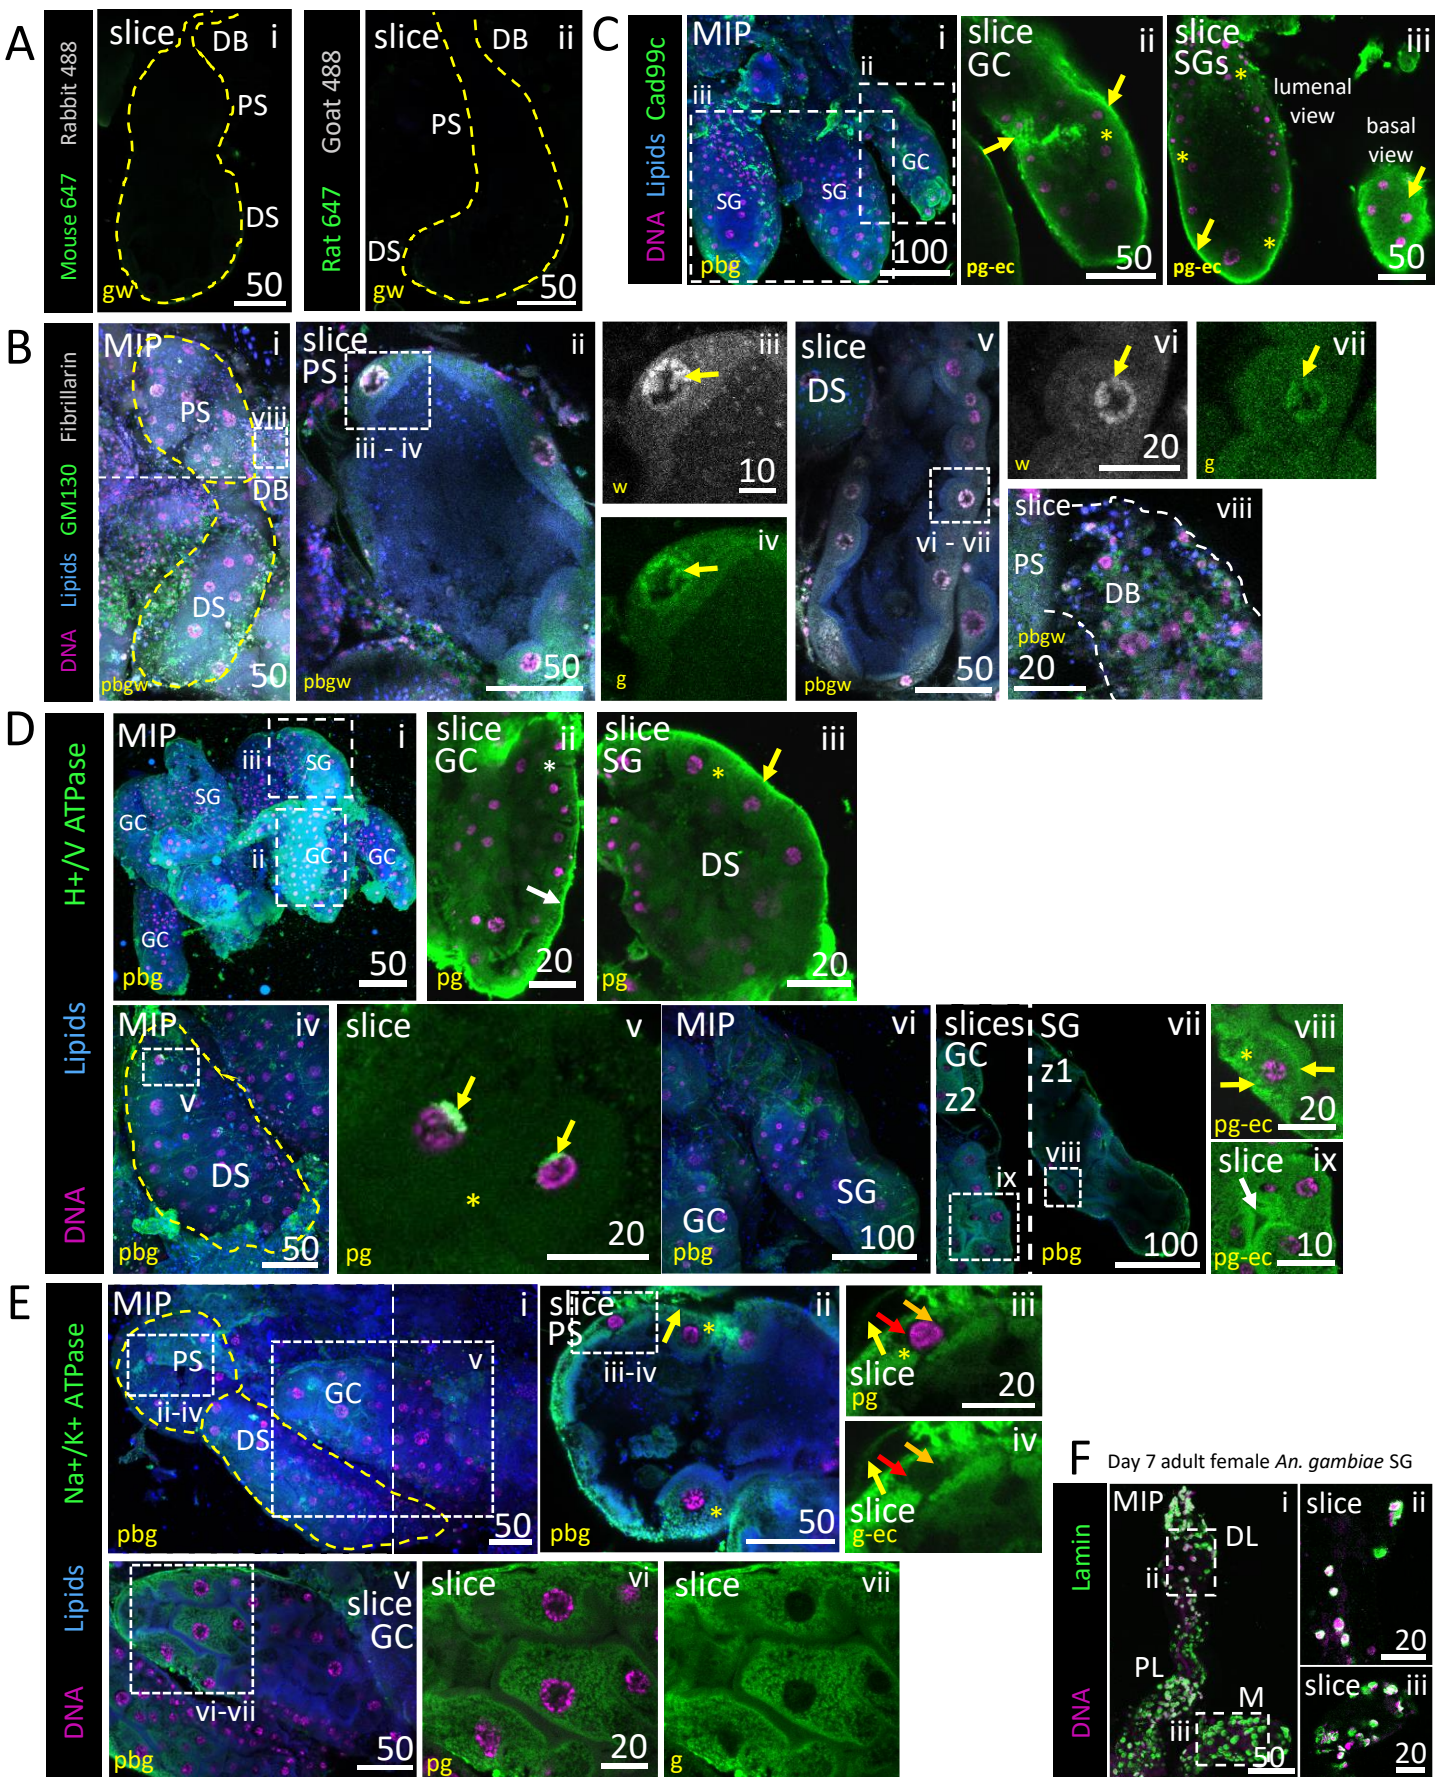

Figure S4

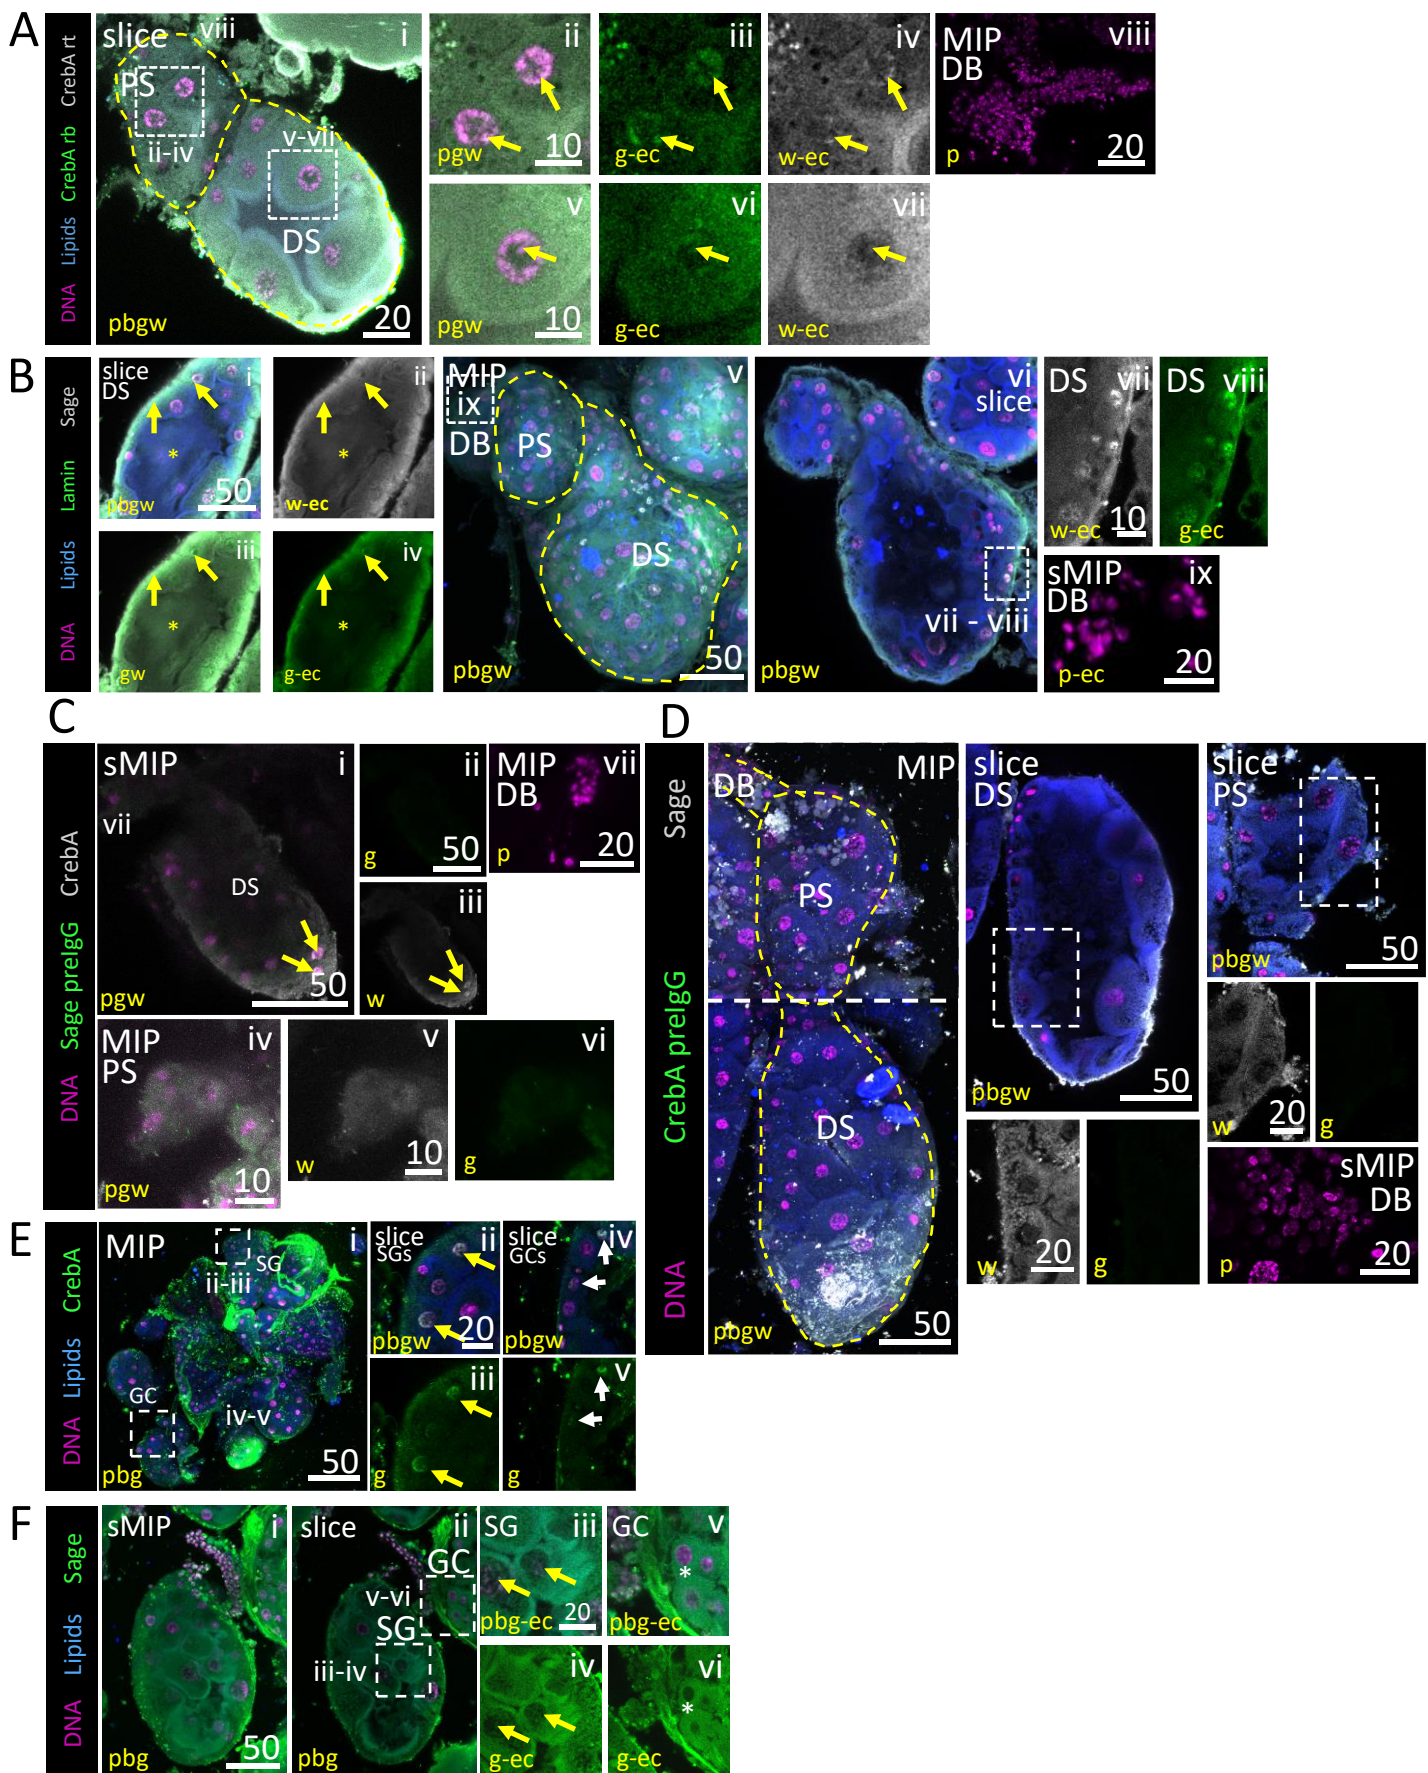

**Table S1. Gene expression datasets analyzed in this study.**

| <b>Tissue</b>           | <b>Stage</b> | <b>Species</b>           | <b>Sex</b> | <b>Assay</b> | <b>NCBI GEO/SRA<br/>Accession Number(s)</b> |
|-------------------------|--------------|--------------------------|------------|--------------|---------------------------------------------|
| Salivary Gland          | L4 larvae    | <i>Anopheles gambiae</i> | mixed      | microarray   | GSM243576-GSM243578                         |
| Salivary Gland          | Adult        | <i>Anopheles gambiae</i> | female     | microarray   | GSM541203-GSM541206                         |
| Salivary Gland          | Adult        | <i>Anopheles gambiae</i> | male       | microarray   | GSM541207-GSM541210                         |
| Gastric Cecae           | L4 larvae    | <i>Anopheles gambiae</i> | mixed      | microarray   | GSM172187-GSM172189                         |
| Larval Anterior Midgut  | L4 larvae    | <i>Anopheles gambiae</i> | mixed      | microarray   | GSM172190-GSM172192                         |
| Larval Posterior Midgut | L4 larvae    | <i>Anopheles gambiae</i> | mixed      | microarray   | GSM172193-GSM172195                         |
| Larval Hindgut          | L4 larvae    | <i>Anopheles gambiae</i> | mixed      | microarray   | GSM172196-GSM172198                         |
| Midgut                  | Adult        | <i>Anopheles gambiae</i> | female     | microarray   | GSM541191-GSM541194                         |
| Midgut                  | Adult        | <i>Anopheles gambiae</i> | male       | microarray   | GSM541195-GSM541198                         |
| Ovary                   | Adult        | <i>Anopheles gambiae</i> | female     | microarray   | GSM541199-GSM541202                         |
| Testes                  | Adult        | <i>Anopheles gambiae</i> | male       | microarray   | GSM541211-GSM541214                         |

**Table S2. 474 Unique Vectorbase ID's of Combined Genes Resulting from DAVID Results of Meta-Analysis and Salivary Gland Genes of Interest Lists.**

| Vectorbase ID |
|---------------|
| AGAP000029    |
| AGAP000035    |
| AGAP000044    |
| AGAP000047    |
| AGAP000150    |
| AGAP000151    |
| AGAP000152    |
| AGAP000187    |
| AGAP000198    |
| AGAP000240    |
| AGAP000374    |
| AGAP000376    |
| AGAP000426    |
| AGAP000436    |
| AGAP000541    |
| AGAP000548    |
| AGAP000561    |
| AGAP000597    |
| AGAP000607    |
| AGAP000609    |
| AGAP000610    |
| AGAP000611    |
| AGAP000612    |
| AGAP000623    |
| AGAP000646    |
| AGAP000651    |
| AGAP000654    |
| AGAP000655    |
| AGAP000728    |
| AGAP000739    |
| AGAP000747    |
| AGAP000751    |
| AGAP000776    |
| AGAP000830    |
| AGAP000898    |
| AGAP000927    |
| AGAP000930    |
| AGAP000949    |
| AGAP000953    |
| AGAP001015    |
| AGAP001043    |
| AGAP001053    |
| AGAP001093    |
| AGAP001194    |
| AGAP001198    |
| AGAP001218    |
| AGAP001219    |
| AGAP001274    |
| AGAP001322    |
| AGAP001326    |
| AGAP001335    |
| AGAP001335    |
| AGAP001374    |
| AGAP001376    |
| AGAP001414    |
| AGAP001459    |
| AGAP001464    |
| AGAP001539    |
| AGAP001545    |
| AGAP001570    |
| AGAP001595    |
| AGAP001671    |
| AGAP001676    |
| AGAP003004    |
| AGAP004886    |
| AGAP006522    |
| AGAP008306    |
| AGAP010252    |
| AGAP011842    |
| AGAP003025    |
| AGAP004887    |
| AGAP006612    |
| AGAP008307    |
| AGAP010257    |
| AGAP011849    |
| AGAP003069    |
| AGAP004919    |
| AGAP006614    |
| AGAP008329    |
| AGAP010261    |
| AGAP011896    |
| AGAP003147    |
| AGAP004920    |
| AGAP006625    |
| AGAP008339    |
| AGAP010265    |
| AGAP011902    |
| AGAP003183    |
| AGAP004921    |
| AGAP006632    |
| AGAP008341    |
| AGAP010286    |
| AGAP011912    |
| AGAP003230    |
| AGAP004922    |
| AGAP006686    |
| AGAP008362    |
| AGAP010313    |
| AGAP011913    |
| AGAP003301    |
| AGAP004957    |
| AGAP006688    |
| AGAP008440    |
| AGAP010386    |
| AGAP011914    |
| AGAP003354    |
| AGAP004989    |
| AGAP006771    |
| AGAP008532    |
| AGAP010396    |
| AGAP011938    |
| AGAP003412    |
| AGAP005003    |
| AGAP006797    |
| AGAP008560    |
| AGAP010406    |
| AGAP011951    |
| AGAP003473    |
| AGAP005046    |
| AGAP006871    |
| AGAP008566    |
| AGAP010510    |
| AGAP011961    |
| AGAP003474    |
| AGAP005061    |
| AGAP006879    |
| AGAP008622    |
| AGAP010591    |
| AGAP011970    |
| AGAP003488    |
| AGAP005095    |
| AGAP006895    |
| AGAP008623    |
| AGAP010592    |
| AGAP011971    |
| AGAP003532    |
| AGAP005110    |
| AGAP006898    |
| AGAP008687    |
| AGAP010629    |
| AGAP011996    |
| AGAP003538    |
| AGAP005131    |
| AGAP007157    |
| AGAP008726    |
| AGAP010647    |
| AGAP012013    |
| AGAP003553    |
| AGAP005176    |
| AGAP007258    |
| AGAP008819    |
| AGAP010655    |
| AGAP012014    |
| AGAP003556    |
| AGAP005213    |
| AGAP007327    |
| AGAP008875    |
| AGAP010719    |
| AGAP012056    |
| AGAP003560    |
| AGAP005222    |
| AGAP007361    |
| AGAP008896    |
| AGAP010735    |
| AGAP012077    |
| AGAP003592    |
| AGAP005263    |
| AGAP007381    |
| AGAP008906    |
| AGAP010736    |
| AGAP012100    |
| AGAP003618    |
| AGAP005317    |
| AGAP007393    |
| AGAP008908    |
| AGAP010784    |
| AGAP012111    |
| AGAP003676    |
| AGAP005318    |
| AGAP007474    |
| AGAP008916    |
| AGAP010828    |
| AGAP012138    |
| AGAP003681    |
| AGAP005319    |
| AGAP007492    |
| AGAP009022    |
| AGAP010894    |
| AGAP012211    |
| AGAP003703    |
| AGAP005337    |
| AGAP007502    |
| AGAP009031    |
| AGAP010895    |
| AGAP012229    |
| AGAP003738    |
| AGAP005339    |
| AGAP007523    |
| AGAP009049    |
| AGAP010921    |
| AGAP012284    |
| AGAP003768    |
| AGAP005427    |
| AGAP007532    |
| AGAP009182    |
| AGAP010926    |
| AGAP012305    |
| AGAP003816    |
| AGAP005469    |
| AGAP007540    |
| AGAP009207    |
| AGAP010929    |
| AGAP012407    |
| AGAP003824    |
| AGAP005520    |
| AGAP007543    |
| AGAP009324    |
| AGAP010933    |
| AGAP012464    |
| AGAP003899    |
| AGAP005575    |
| AGAP007580    |
| AGAP009338    |
| AGAP010985    |
| AGAP012521    |
| AGAP003902    |
| AGAP005578    |
| AGAP007581    |
| AGAP009431    |
| AGAP011026    |
| AGAP012603    |
| AGAP003967    |
| AGAP005609    |
| AGAP007586    |
| AGAP009460    |
| AGAP011033    |
| AGAP012633    |
| AGAP003970    |
| AGAP005634    |
| AGAP007635    |
| AGAP009461    |
| AGAP011038    |
| AGAP012755    |
| AGAP003975    |
| AGAP005802    |
| AGAP007644    |
| AGAP009483    |
| AGAP011077    |
| AGAP012756    |
| AGAP003984    |
| AGAP005817    |
| AGAP007650    |
| AGAP009503    |
| AGAP011162    |
| AGAP012798    |
| AGAP004050    |
| AGAP005822    |
| AGAP007690    |
| AGAP009508    |
| AGAP011173    |
| AGAP012879    |
| AGAP004098    |
| AGAP005839    |
| AGAP007706    |
| AGAP009537    |
| AGAP011203    |
| AGAP012890    |
| AGAP004192    |
| AGAP005853    |
| AGAP007709    |
| AGAP009554    |
| AGAP011214    |
| AGAP012906    |
| AGAP004194    |
| AGAP005857    |
| AGAP007740    |
| AGAP009572    |
| AGAP011246    |
| AGAP012990    |
| AGAP004211    |
| AGAP005930    |
| AGAP007797    |
| AGAP009632    |
| AGAP011298    |
| AGAP012991    |
| AGAP004212    |
| AGAP005947    |
| AGAP007826    |
| AGAP009730    |
| AGAP011354    |
| AGAP013120    |
| AGAP004239    |
| AGAP005960    |
| AGAP007831    |
| AGAP009748    |
| AGAP011358    |
| AGAP013166    |
| AGAP004275    |
| AGAP005991    |
| AGAP007834    |
| AGAP009784    |
| AGAP011359    |
| AGAP013192    |
| AGAP004296    |
| AGAP006037    |
| AGAP007864    |
| AGAP009861    |
| AGAP011396    |
| AGAP013260    |
| AGAP004334    |
| AGAP006044    |
| AGAP007913    |
| AGAP009880    |
| AGAP011402    |
| AGAP013266    |
| AGAP004335    |
| AGAP006086    |
| AGAP007927    |
| AGAP009910    |
| AGAP011424    |
| AGAP013335    |
| AGAP004422    |
| AGAP006141    |
| AGAP007940    |
| AGAP009917    |
| AGAP011448    |
| AGAP013423    |
| AGAP004439    |
| AGAP006371    |
| AGAP008015    |
| AGAP009920    |
| AGAP011501    |
| AGAP013516    |
| AGAP004488    |
| AGAP006386    |
| AGAP008044    |
| AGAP009942    |
| AGAP011504    |
| AGAP013724    |
| AGAP004494    |
| AGAP006388    |
| AGAP008060    |
| AGAP009948    |
| AGAP011514    |
| AGAP013742    |
| AGAP004560    |
| AGAP006414    |
| AGAP008061    |
| AGAP009974    |
| AGAP011515    |
| AGAP028120    |
| AGAP004579    |
| AGAP006418    |
| AGAP008118    |
| AGAP009998    |
| AGAP011516    |
| AGAP028125    |
| AGAP004625    |
| AGAP006419    |
| AGAP008191    |
| AGAP010010    |
| AGAP011551    |
| AGAP028143    |
| AGAP004628    |
| AGAP006420    |
| AGAP008215    |
| AGAP010017    |
| AGAP011552    |
| AGAP028694    |
| AGAP004699    |
| AGAP006421    |
| AGAP008216    |
| AGAP010065    |
| AGAP011687    |
| AGAP029544    |
| AGAP004743    |
| AGAP006462    |
| AGAP008278    |
| AGAP010160    |
| AGAP011691    |
| AGAP004754    |
| AGAP006477    |
| AGAP008279    |
| AGAP010163    |
| AGAP011693    |
| AGAP004798    |
| AGAP006494    |
| AGAP008280    |
| AGAP010216    |
| AGAP011706    |
| AGAP004819    |
| AGAP006495    |
| AGAP008281    |
| AGAP010220    |
| AGAP011725    |
| AGAP004831    |
| AGAP006504    |
| AGAP008282    |
| AGAP010224    |
| AGAP011777    |
| AGAP004852    |
| AGAP006506    |
| AGAP008283    |
| AGAP010225    |
| AGAP011799    |
| AGAP004876    |
| AGAP006511    |
| AGAP008284    |
| AGAP010251    |
| AGAP011802    |



# Figure S5

## A

**i**

| Larvae: GO Term                                      | Gene Count | %   | P-Value  | Benjamini |
|------------------------------------------------------|------------|-----|----------|-----------|
| transporter activity                                 | 12         | 1.7 | 4.00E-03 | 7.10E-01  |
| retrograde vesicle-mediated transport, Golgi to ER   | 5          | 0.7 | 6.90E-03 | 9.30E-01  |
| endoplasmic reticulum                                | 11         | 1.6 | 9.80E-03 | 7.90E-01  |
| pyrimidine nucleotide biosynthetic process           | 3          | 0.4 | 1.10E-02 | 8.80E-01  |
| mitophagy                                            | 5          | 0.7 | 1.90E-02 | 9.10E-01  |
| phospholipid-translocating ATPase activity           | 3          | 0.4 | 3.20E-02 | 9.90E-01  |
| CCR4-NOT core complex                                | 3          | 0.4 | 3.20E-02 | 9.30E-01  |
| protein localization to pre-autophagosomal structure | 3          | 0.4 | 3.50E-02 | 9.60E-01  |
| ceramide biosynthetic process                        | 3          | 0.4 | 3.50E-02 | 9.60E-01  |
| nucleophagy                                          | 4          | 0.6 | 3.50E-02 | 9.30E-01  |

**ii**

| Female: GO Term                                                  | Gene Count | %   | P-Value  | Benjamini |
|------------------------------------------------------------------|------------|-----|----------|-----------|
| transaminase activity                                            | 3          | 0.4 | 2.40E-02 | 1.00E+00  |
| nucleosomal DNA binding                                          | 4          | 0.5 | 2.50E-02 | 9.80E-01  |
| iron-sulfur cluster binding                                      | 4          | 0.5 | 2.50E-02 | 9.80E-01  |
| lipid transporter activity                                       | 4          | 0.5 | 3.20E-02 | 9.70E-01  |
| cytoplasmic microtubule organization                             | 4          | 0.5 | 3.60E-02 | 1.00E+00  |
| cell division                                                    | 4          | 0.5 | 3.60E-02 | 1.00E+00  |
| ATPase activity, coupled to transmembrane movement of substances | 7          | 1   | 3.80E-02 | 9.50E-01  |
| 3-oxo-lignoceronyl-CoA synthase activity                         | 5          | 0.7 | 4.00E-02 | 9.20E-01  |
| 3-oxo-arachidoyl-CoA synthase activity                           | 5          | 0.7 | 4.00E-02 | 9.20E-01  |
| 3-oxo-cerotoyl-CoA synthase activity                             | 5          | 0.7 | 4.00E-02 | 9.20E-01  |

**iii**

| Male: GO Term                                         | Gene Count | %   | P-Value  | Benjamini |
|-------------------------------------------------------|------------|-----|----------|-----------|
| dynein complex                                        | 7          | 1.2 | 2.70E-05 | 2.70E-03  |
| integral component of plasma membrane                 | 31         | 5.1 | 5.30E-05 | 2.60E-03  |
| 1-acylglycerol-3-phosphate O-acyltransferase activity | 5          | 0.8 | 3.90E-04 | 8.70E-02  |
| microtubule motor activity                            | 8          | 1.3 | 1.30E-03 | 1.40E-01  |
| histone H3-K4 methylation                             | 4          | 0.7 | 2.20E-03 | 4.50E-01  |
| microtubule-based movement                            | 8          | 1.3 | 2.40E-03 | 2.80E-01  |
| sensory perception of smell                           | 6          | 1   | 2.50E-03 | 2.00E-01  |
| iron ion binding                                      | 18         | 3   | 2.60E-03 | 1.80E-01  |
| monooxygenase activity                                | 14         | 2.3 | 2.80E-03 | 1.50E-01  |
| oxidoreductase activity                               | 18         | 3   | 4.30E-03 | 1.80E-01  |

**iv**

| L&M: GO Term                                                                                          | Gene Count | %   | P-Value  | Benjamini |
|-------------------------------------------------------------------------------------------------------|------------|-----|----------|-----------|
| heme binding                                                                                          | 7          | 4.2 | 1.90E-02 | 8.80E-01  |
| oxidoreductase activity, acting on paired donors, with incorporation or reduction of molecular oxygen | 6          | 3.6 | 2.20E-02 | 6.90E-01  |
| signal transducer activity                                                                            | 3          | 1.8 | 4.60E-02 | 8.10E-01  |
| hexose transmembrane transport                                                                        | 3          | 1.8 | 5.20E-02 | 1.00E+00  |
| glucose import                                                                                        | 3          | 1.8 | 5.20E-02 | 1.00E+00  |
| glucose transmembrane transporter activity                                                            | 3          | 1.8 | 5.20E-02 | 7.60E-01  |
| triglyceride biosynthetic process                                                                     | 2          | 1.2 | 5.40E-02 | 9.40E-01  |
| protein glycosylation                                                                                 | 3          | 1.8 | 5.90E-02 | 8.80E-01  |
| sugar:proton symporter activity                                                                       | 3          | 1.8 | 6.30E-02 | 7.50E-01  |
| iron ion binding                                                                                      | 6          | 3.6 | 6.60E-02 | 7.00E-01  |

**v**

| L&F: GO Term                             | Gene Count | %   | P-Value  | Benjamini |
|------------------------------------------|------------|-----|----------|-----------|
| response to stress                       | 5          | 1.3 | 1.60E-04 | 3.70E-02  |
| protein folding                          | 11         | 2.8 | 2.20E-04 | 2.60E-02  |
| ATP binding                              | 39         | 10  | 7.00E-04 | 1.20E-01  |
| GTP binding                              | 13         | 3.3 | 2.00E-03 | 1.60E-01  |
| endoplasmic reticulum                    | 9          | 2.3 | 2.30E-03 | 2.40E-01  |
| endosome                                 | 5          | 1.3 | 3.80E-03 | 2.00E-01  |
| U1 snRNP                                 | 4          | 1   | 8.20E-03 | 2.80E-01  |
| tRNA modification                        | 3          | 0.8 | 3.70E-02 | 9.50E-01  |
| response to endoplasmic reticulum stress | 3          | 0.8 | 4.60E-02 | 9.40E-01  |
| isoprenoid biosynthetic process          | 3          | 0.8 | 4.60E-02 | 9.40E-01  |

**vi**

| M&F: GO Term                                | Gene Count | %   | P-Value  | Benjamini |
|---------------------------------------------|------------|-----|----------|-----------|
| oxidoreductase activity                     | 39         | 2.9 | 4.00E-05 | 1.90E-02  |
| proteolysis                                 | 17         | 1.3 | 4.90E-04 | 2.50E-01  |
| digestion                                   | 7          | 0.5 | 9.80E-04 | 2.50E-01  |
| catalytic activity                          | 22         | 1.6 | 7.70E-03 | 8.50E-01  |
| N-acetylmuramoyl-L-alanine amidase activity | 5          | 0.4 | 9.30E-03 | 7.80E-01  |
| peptidoglycan catabolic process             | 5          | 0.4 | 1.10E-02 | 8.90E-01  |
| RNA processing                              | 9          | 0.7 | 1.80E-02 | 9.30E-01  |
| methyltransferase activity                  | 7          | 0.5 | 1.90E-02 | 9.00E-01  |
| nuclear nucleosome                          | 4          | 0.3 | 2.10E-02 | 9.90E-01  |
| serine-type carboxypeptidase activity       | 6          | 0.4 | 3.30E-02 | 9.60E-01  |

**vii**

| ALL: GO Term                           | Gene Count | %   | P-Value  | Benjamini |
|----------------------------------------|------------|-----|----------|-----------|
| structural constituent of ribosome     | 137        | 4.9 | 3.00E-47 | 2.40E-44  |
| translation                            | 112        | 4   | 1.60E-26 | 1.70E-23  |
| cytosolic large ribosomal subunit      | 49         | 1.7 | 2.00E-23 | 8.10E-21  |
| cytosolic small ribosomal subunit      | 32         | 1.1 | 2.00E-15 | 4.10E-13  |
| mitochondrion                          | 103        | 3.7 | 3.50E-14 | 4.80E-12  |
| ribosome                               | 26         | 0.9 | 3.00E-12 | 3.00E-10  |
| RNA binding                            | 84         | 3   | 3.00E-10 | 1.20E-07  |
| protein folding                        | 48         | 1.7 | 4.50E-09 | 2.30E-06  |
| translation initiation factor activity | 23         | 0.8 | 1.40E-08 | 3.80E-06  |
| cytoplasm                              | 252        | 9   | 5.70E-08 | 4.70E-06  |

**viii**

| NONE: GO Term                                                              | Gene Count | %   | P-Value  | Benjamini |
|----------------------------------------------------------------------------|------------|-----|----------|-----------|
| plasma membrane                                                            | 229        | 4.3 | 5.60E-22 | 2.30E-19  |
| olfactory receptor activity                                                | 112        | 2.1 | 2.20E-21 | 1.80E-18  |
| detection of the chemical stimulus involved in sensory perception of smell | 67         | 1.3 | 1.10E-17 | 1.30E-14  |
| nucleus                                                                    | 527        | 9.9 | 3.80E-16 | 6.90E-14  |
| odorant binding                                                            | 119        | 2.2 | 1.00E-15 | 4.10E-13  |
| sequence-specific DNA binding                                              | 128        | 2.4 | 3.10E-15 | 8.10E-13  |
| regulation of transcription, DNA-templated                                 | 135        | 2.5 | 5.70E-14 | 3.10E-11  |
| signal transduction                                                        | 91         | 1.7 | 4.90E-10 | 1.80E-07  |
| transcription factor activity, sequence-specific DNA binding               | 102        | 1.9 | 6.00E-09 | 1.20E-06  |
| zinc ion binding                                                           | 325        | 6.1 | 7.40E-08 | 1.20E-05  |

## B

| Comparison                           | Stage  | SG Present          | Tissue Present      | SG present          | Absent  |
|--------------------------------------|--------|---------------------|---------------------|---------------------|---------|
|                                      |        | Tissue Absent       | SG Absent           | Tissue Present      | in Both |
| Gastric Cecae vs. Anterior Midgut    | Larval | 54% (3672)          | 25% (1734)          | 21% (1407)          | 5779    |
| Gastric Cecae vs. Posterior Midgut   | Larval | 45% (3271)          | 30% (2206)          | 35% (1808)          | 5307    |
| Gastric cecae vs. Hindgut            | Larval | 28% (2338)          | 39% (3294)          | 33% (2741)          | 4219    |
| Anterior Midgut vs. Posterior Midgut | Larval | 4% (188)            | 25% (1061)          | 70% (2953)          | 8390    |
| Anterior Midgut vs. Hindgut          | Larval | 2% (133)            | 49% (3027)          | 49% (3008)          | 6424    |
| Posterior Midgut vs. Hindgut         | Larval | 3% (209)            | 36% (2230)          | 61% (3805)          | 6348    |
| SG vs. Gastric Cecae                 | Larval | 10.3% (582)         | 31.4% (1778)        | <b>58.3% (3301)</b> | 6931    |
| SG vs. Anterior Midgut               | Larval | <b>47.2% (2804)</b> | 34.7% (2062)        | 18.1% (1079)        | 6647    |
| SG vs. Posterior Midgut              | Larval | <b>38.4% (2498)</b> | 40.4% (2629)        | 21.3% (1385)        | 6080    |
| SG vs. Hindgut                       | Larval | 23.2% (1819)        | <b>50.6% (3971)</b> | 26.3% (2064)        | 4738    |
| SG vs. Midgut (Female)               | Adult  | 21.8% (1296)        | 18% (1069)          | <b>60.3% (3588)</b> | 6639    |
| SG vs. Midgut (Male)                 | Adult  | 19.7% (1144)        | 19.3% (1123)        | <b>60.9% (3538)</b> | 6787    |
| SG vs. Ovary                         | Adult  | 27.5% (1999)        | <b>46.4% (3377)</b> | 26% (1884)          | 5332    |
| SG vs. Testes                        | Adult  | 20.2% (1676)        | <b>53.2% (4420)</b> | 26.6% (2207)        | 4291    |



**Table S3. Primers used for Independent Validation by RT-PCR and RT-qPCR Analysis of Controls and a Subset of Meta-Analysis Genes.**

| Gene                             | Primer ID              | Sequence                           | Product size |
|----------------------------------|------------------------|------------------------------------|--------------|
| Forkhead:<br>AGAP001671          | Fkh_f<br>262730040     | 5'- CATGGATCTGTTCCCGTTCT-3'        | 220 bp       |
|                                  | Fkh_r<br>262730041     | 5'- CACCTCCTTCTTCTCGTCCTT-3'       |              |
| CrebA:<br>AGAP011038             | CrebA_f<br>262730048   | 5'- GACGTGACATGGAGGAGAT-3'         | 200 bp       |
|                                  | CrebA_r<br>262730049   | 5'- GTACTCCTTCTTGCGCTTGC -3'       |              |
| Apyrase:<br>AGAP011971           | Apy_f<br>262730060     | 5'- GGGTGACAACCTCCAGGGTA -3'       | 300 bp       |
|                                  | Apy_r<br>262730061     | 5'- TAGAGCGGATCAGGTTGTC -3'        |              |
| 5' Nucleosidase:<br>AGAP011026   | 5nucleo_f<br>262730064 | 5'- CTGCGCTTAAGAAGGACCAG -3'       | 200 bp       |
|                                  | 5nucleo_r<br>262730065 | 5'- TACCGTTGGTGTGGTTCTCA -3'       |              |
| Maltase:<br>AGAP002102           | Mal_f<br>262730074     | 5'- GCTGCTGACGGTGAACAGTA -3'       | 200 bp       |
|                                  | Mal_r<br>262730075     | 5'- GTTCCACGAGATCCACTGGT-3'        |              |
| Peroxidase:<br>AGAP029194        | Perox_f<br>262730080   | 5'-TCTTATGCTGAGTGCCATCG-3'         | 190 bp       |
|                                  | Perox_r<br>262730081   | 5'- GTTCAGCTCCGTTATGGAA -3'        |              |
| Sage:<br>AGAP013335              | Sage_f<br>260891 319   | 5'- ATCCCGGTCAGTGTGCTAAA -3'       | 150 bp       |
|                                  | Sage_r<br>260891 320   | 5'- GAAAGCTCAGCATACCGTCC -3'       |              |
| SG6:<br>AGAP000150               | Sg6_f<br>260891 343    | 5'-TTCAAAGGCGAACGGTTCTG-3'         | 245 bp       |
|                                  | Sg6_r<br>260891 344    | 5'- GTCTCCCAGAAACGGTAGCT -3'       |              |
| Saglin:<br>AGAP000610            | Sagl_f<br>260891355    | 5'- GCAGTTTGACATTTGCGAGC -3'       | 150 bp       |
|                                  | Sagl_r<br>260891356    | 5'-ATGATGGTGAAGGTTTGCG -3'         |              |
| Actin:<br>AGAP000651             | HK_Act_f               | 5'-TACAACCTCGATCATGAAGTGCGA -3'    | 101 bp       |
|                                  | HK_Act_r               | 5'-CCC GGGTACATGGTGGTACCGCCGGA -3' |              |
| Elongation Factor:<br>AGAP005128 | HK_EFact_f             | 5'-GGCAAGAGGCATAACGATCAATGCG -3'   | 90 bp        |
|                                  | HK_EFact_r             | 5'-GTCCATCTGCGACGCTCCGG -3'        |              |
